# Supplementary material for: Self-Reported Cannabis Use and HIV Viral Control among Patients with HIV Engaged in Care: Results from a National Cohort Study
Source: MDPI journal article supplement (doi:10.3390/ijerph19095649), 2022-05-06
Supplement: s1 [file s1]

## Supplementary Materials

**Table S1.** Sociodemographic and clinical characteristics associated with cannabis use categories among people living with HIV receiving antiretroviral therapy in the VACS cohort (2002–2018).

| Characteristic                                    | Overall<br>(N= 2515) | No lifetime use<br>(N=737, 29.3%) | Lifetime but none in past<br>year (N=1093, 43.5%) | Past year use<br>(N=685, 27.2%) | Global<br><i>p</i> -value |
|---------------------------------------------------|----------------------|-----------------------------------|---------------------------------------------------|---------------------------------|---------------------------|
| <b>Demographics</b>                               |                      |                                   |                                                   |                                 |                           |
| Age, mean (SD)                                    | 50.1 (8.8)           | 51.2 (10.6)                       | 50.2 (7.7)                                        | 48.7 (8.2)                      | <0.0001                   |
| Gender, <i>n</i> (%)                              |                      |                                   |                                                   |                                 | 0.762                     |
| Male                                              | 2447<br>(97.3)       | 719 (97.6)                        | 1064 (97.4)                                       | 664 (96.9)                      |                           |
| Female                                            | 68 (2.7)             | 18 (2.4)                          | 29 (2.7)                                          | 21 (3.1)                        |                           |
| Race/ethnicity, <i>n</i> (%)                      |                      |                                   |                                                   |                                 | 0.133                     |
| Non-Hispanic White                                | 524 (20.8)           | 138 (18.5)                        | 227 (20.8)                                        | 161 (23.5)                      |                           |
| Non-Hispanic Black                                | 1646<br>(65.5)       | 500 (67.8)                        | 714 (65.3)                                        | 432 (63.1)                      |                           |
| Hispanic (any race)                               | 247 (9.8)            | 80 (10.9)                         | 105 (9.6)                                         | 62 (9.1)                        |                           |
| Other (multiple race or un-<br>known)             | 98 (3.9)             | 21 (2.9)                          | 47 (4.3)                                          | 30 (4.4)                        |                           |
| Education, <i>n</i> (%)                           |                      |                                   |                                                   |                                 | 0.205                     |
| High school or less                               | 987 (39.7)           | 297 (41.0)                        | 439 (40.6)                                        | 251 (36.9)                      |                           |
| Some college or more                              | 1500<br>(60.3)       | 427 (59.0)                        | 643 (59.4)                                        | 430 (63.1)                      |                           |
| Marital status, <i>n</i> (%)                      |                      |                                   |                                                   |                                 | 0.164                     |
| Never married                                     | 610 (24.6)           | 186 (25.7)                        | 254 (23.6)                                        | 170 (25.2)                      |                           |
| Married/living with a part-<br>ner                | 981 (39.6)           | 278 (38.4)                        | 456 (42.3)                                        | 247 (36.7)                      |                           |
| Divorced/widowed                                  | 885 (35.7)           | 260 (35.9)                        | 368 (34.1)                                        | 257 (38.1)                      |                           |
| Housing instability ever, <i>n</i><br>(%)         | 982 (39.3)           | 192 (26.2)                        | 488 (44.9)                                        | 302 (44.3)                      | <0.0001                   |
| Location of residence, <i>n</i> (%)               |                      |                                   |                                                   |                                 | 0.670                     |
| Urban                                             | 2368<br>(95.0)       | 691 (94.8)                        | 1035 (95.5)                                       | 642 (94.3)                      |                           |
| Suburban                                          | 70 (2.8)             | 20 (2.7)                          | 30 (2.8)                                          | 20 (2.9)                        |                           |
| Rural                                             | 56 (2.3)             | 18 (2.5)                          | 19 (1.8)                                          | 19 (2.8)                        |                           |
| Annual income, <i>n</i> (%)                       |                      |                                   |                                                   |                                 | 0.001                     |
| <\$11,999                                         | 1213<br>(49.8)       | 311 (44.1)                        | 548 (51.5)                                        | 354 (53.2)                      |                           |
| \$12,000-\$49,999                                 | 1038<br>(42.6)       | 332 (47.1)                        | 429 (40.3)                                        | 277 (41.6)                      |                           |
| ≥\$50,000                                         | 184 (7.6)            | 62 (8.8)                          | 87 (8.2)                                          | 35 (5.3)                        |                           |
| Social Isolation Score                            |                      |                                   |                                                   |                                 | 0.0001                    |
| <4                                                | 680 (27.0)           | 242 (32.8)                        | 274 (25.1)                                        | 164 (23.9)                      |                           |
| ≥4                                                | 1835<br>(73.0)       | 495 (67.2)                        | 819 (74.9)                                        | 521 (76.1)                      |                           |
| <b>HIV-related factors</b>                        |                      |                                   |                                                   |                                 |                           |
| CD4 cell count, cells/mm <sup>3</sup> ,<br>median | 374<br>(228, 568)    | 400<br>(240, 592)                 | 361<br>(223, 568)                                 | 365 (219, 549)                  | 0.071                     |

|                                                         |             |             |             |             |         |
|---------------------------------------------------------|-------------|-------------|-------------|-------------|---------|
| (IQR)                                                   |             |             |             |             |         |
| HIV viral load <500 copies/mL, <i>n</i> (%)             | 1690 (67.2) | 503 (68.3)  | 756 (69.2)  | 431 (62.9)  | 0.019   |
| VACS Index 2.0 score, median (IQR)                      | 56 (46, 66) | 55 (45, 66) | 56 (47, 66) | 56 (46, 67) | 0.066   |
| ART adherent, <i>n</i> (%)                              | 1551 (61.7) | 479 (65.0)  | 685 (62.7)  | 387 (56.5)  | 0.003   |
| <b>Other health conditions and status, <i>n</i> (%)</b> |             |             |             |             |         |
| HCV co-infection                                        | 929 (36.9)  | 202 (27.4)  | 462 (42.3)  | 265 (38.7)  | <0.0001 |
| Any cancer                                              | 524 (20.8)  | 148 (20.1)  | 227 (20.8)  | 149 (21.8)  | 0.739   |
| Anxiety symptoms                                        | 905 (37.1)  | 219 (30.7)  | 400 (37.7)  | 286 (42.9)  | <0.0001 |
| Depressive symptoms                                     | 534 (21.5)  | 121 (16.7)  | 226 (20.8)  | 187 (27.5)  | <0.0001 |
| Pain interference                                       | 830 (33.3)  | 218 (30.0)  | 364 (33.6)  | 248 (36.4)  | 0.035   |
| <b>Other substance use, <i>n</i> (%)</b>                |             |             |             |             |         |
| Smokes cigarettes                                       | 1915 (76.1) | 444 (60.2)  | 893 (81.7)  | 578 (84.4)  | <0.0001 |
| Unhealthy alcohol use                                   | 876 (34.8)  | 207 (28.1)  | 392 (35.9)  | 277 (40.4)  | <0.0001 |
| Past year stimulants or cocaine                         | 538 (21.4)  | 77 (10.5)   | 175 (16.0)  | 286 (41.8)  | <0.0001 |
| <b>Prescribed opioid receipt, <i>n</i> (%)</b>          |             |             |             |             | 0.003   |
| No opioid receipt                                       | 1802 (71.7) | 559 (75.9)  | 787 (72.0)  | 456 (66.6)  |         |
| Short-term + low dose                                   | 449 (17.9)  | 108 (14.7)  | 200 (18.3)  | 141 (20.6)  |         |
| Short-term + high dose                                  | 40 (1.6)    | 12 (1.6)    | 21 (1.9)    | 7 (1.0)     |         |
| Long-term + low dose                                    | 159 (6.3)   | 43 (5.8)    | 57 (5.2)    | 59 (8.6)    |         |
| Long-term + high dose                                   | 65 (2.6)    | 15 (2.0)    | 28 (2.6)    | 22 (3.2)    |         |
| <b>Prescribed benzodiazepine</b>                        |             |             |             |             | 0.521   |
| None                                                    | 2147 (85.4) | 639 (86.7)  | 934 (85.5)  | 574 (83.8)  |         |
| Low dose                                                | 269 (10.7)  | 70 (9.5)    | 120 (11.0)  | 79 (11.5)   |         |
| High dose                                               | 99 (3.9)    | 28 (3.8)    | 39 (3.6)    | 32 (4.7)    |         |
| <b>Prescribed gabapentin</b>                            |             |             |             |             | 0.280   |
| None                                                    | 2240 (89.1) | 668 (90.6)  | 971 (88.8)  | 601 (87.7)  |         |
| Low dose                                                | 127 (5.1)   | 29 (3.9)    | 62 (5.7)    | 36 (5.3)    |         |
| High dose                                               | 148 (5.9)   | 40 (5.4)    | 60 (5.5)    | 48 (7.0)    |         |
| <b>Prescribed antidepressant</b>                        |             |             |             |             | <0.0001 |
| None                                                    | 1557 (61.9) | 508 (68.9)  | 653 (59.7)  | 396 (57.8)  |         |
| Short term                                              | 314 (12.5)  | 80 (10.9)   | 147 (13.5)  | 87 (12.7)   |         |
| Long term                                               | 644 (25.6)  | 149 (20.2)  | 293 (26.8)  | 202 (29.5)  |         |
| <b>Site</b>                                             |             |             |             |             | 0.109   |
| Atlanta                                                 | 403 (16.0)  | 141 (19.1)  | 158 (14.5)  | 104 (15.2)  |         |
| Bronx                                                   | 258 (10.3)  | 76 (10.3)   | 114 (10.4)  | 68 (9.9)    |         |
| Houston                                                 | 335 (13.3)  | 99 (13.4)   | 143 (13.1)  | 93 (13.6)   |         |
| Los Angeles                                             | 334 (13.3)  | 94 (12.8)   | 131 (12.0)  | 109 (15.9)  |         |

|                                       |            |            |            |            |       |
|---------------------------------------|------------|------------|------------|------------|-------|
| New York                              | 399 (15.9) | 105 (14.3) | 190 (17.4) | 104 (15.2) |       |
| Baltimore                             | 282 (11.2) | 77 (10.5)  | 137 (12.5) | 68 (9.9)   |       |
| Washington DC                         | 408 (16.2) | 121 (16.2) | 181 (16.6) | 106 (15.5) |       |
| Pittsburgh                            | 96 (3.8)   | 24 (3.3)   | 39 (3.6)   | 33 (4.8)   |       |
| <b>Calendar year</b>                  |            |            |            |            | 0.145 |
| 2002–2006                             | 781 (31.5) | 245 (33.8) | 338 (31.3) | 198 (29.3) |       |
| 2007–2011                             | 976 (39.3) | 275 (37.9) | 442 (40.9) | 259 (38.3) |       |
| 2012–2017                             | 724 (29.2) | 205 (28.3) | 300 (27.8) | 219 (32.4) |       |
| Average follow-up years,<br>mean (SD) | 7.0 (3.7)  | 6.9 (3.7)  | 7.0 (3.7)  | 7.3 (3.7)  | 0.083 |
| Died during study                     | 904 (35.9) | 260 (35.3) | 406 (37.2) | 238 (34.7) | 0.534 |

**Table S2.** Generalized estimating equation (GEE) analysis for the association between frequency of cannabis use with undetectable HIV viral load status (<500 copies/ml vs. ≥500 copies/ml) among *n*=2,515 PWH engaged in care. Results are presented as odds ratios (OR) from the unadjusted analysis, adjusted for all covariates, and adjusted for all covariates plus adherence to antiretroviral therapy.

|                                        | Unadjusted Odds Ratios [95% CI] | Model I, Adjusted Odds Ratios [95% CI] | Model II, Adjusted Odds Ratios [95% CI] | Model III, Adjusted Odds Ratios [95% CI] | Model IV, Adjusted Odds Ratios [95% CI] |
|----------------------------------------|---------------------------------|----------------------------------------|-----------------------------------------|------------------------------------------|-----------------------------------------|
| <b>Cannabis</b>                        |                                 |                                        |                                         |                                          |                                         |
| No lifetime                            | Ref                             | Ref                                    | Ref                                     | Ref                                      | Ref                                     |
| Lifetime but none in past year         | 0.95 (0.84–1.08)                | 0.91 (0.80–1.04)                       | 0.88 (0.77–0.99)                        | 0.95 (0.79–1.15)                         | 0.96 (0.79–1.16)                        |
| Past year use                          | <b>1.17 (1.01–1.36)</b>         | 1.04 (0.90–1.22)                       | 0.89 (0.76–1.05)                        | 0.99 (0.80–1.24)                         | 0.98 (0.78–1.23)                        |
| <b>Age</b>                             |                                 | <b>0.95 (0.94, 0.95)</b>               | <b>0.95 (0.94–0.95)</b>                 | <b>0.96 (0.95–0.97)</b>                  | <b>0.96 (0.95–0.97)</b>                 |
| <b>Race/ethnicity</b>                  |                                 |                                        |                                         |                                          |                                         |
| Non-Hispanic White                     |                                 | Ref                                    | Ref                                     | Ref                                      | Ref                                     |
| Non-Hispanic Black                     |                                 | <b>1.21 (1.02–1.43)</b>                | 1.15 (0.97–1.36)                        | 1.20 (0.96–1.50)                         | 1.12 (0.89–1.40)                        |
| Hispanic (any race)                    |                                 | 0.84 (0.65–1.09)                       | 0.82 (0.63–1.06)                        | 0.93 (0.67–1.29)                         | 0.93 (0.66–1.30)                        |
| Other (multiple race or unknown)       |                                 | 1.00 (0.69–1.44)                       | 0.96 (0.66–1.40)                        | 1.19 (0.76–1.86)                         | 1.14 (0.72–1.79)                        |
| <b>Sex</b>                             |                                 |                                        |                                         |                                          |                                         |
| Male                                   |                                 | Ref                                    | Ref                                     | Ref                                      | Ref                                     |
| Female                                 |                                 | <b>0.62 (0.40–0.94)</b>                | <b>0.62 (0.41–0.95)</b>                 | 0.64 (0.36–1.14)                         | <b>0.56 (0.32–0.97)</b>                 |
| <b>Unhealthy alcohol use</b>           |                                 |                                        |                                         |                                          |                                         |
| Yes                                    |                                 |                                        | <b>1.15 (1.01–1.30)</b>                 | <b>0.83 (0.70–0.98)</b>                  | <b>0.78 (0.66–0.93)</b>                 |
| No                                     |                                 |                                        | Ref                                     | Ref                                      | Ref                                     |
| <b>Past-year stimulant/cocaine use</b> |                                 |                                        |                                         |                                          |                                         |
| Yes                                    |                                 |                                        | <b>1.58 (1.37–1.81)</b>                 | <b>1.45 (1.18–1.79)</b>                  | <b>1.37 (1.11–1.69)</b>                 |
| No                                     |                                 |                                        | Ref                                     | Ref                                      | Ref                                     |
| <b>Opioid Use</b>                      |                                 |                                        |                                         |                                          |                                         |
| No opioid receipt                      |                                 |                                        | Ref                                     | Ref                                      | Ref                                     |
| Short-term + low dose                  |                                 |                                        | 1.02 (0.90–1.15)                        | 0.98 (0.81–1.20)                         | 0.97 (0.80–1.19)                        |
| Short-term + high dose                 |                                 |                                        | 1.04 (0.67–1.61)                        | 1.86 (0.99–3.49)                         | 1.72 (0.92–3.23)                        |
| Long-term + low dose                   |                                 |                                        | 1.22 (0.99–1.49)                        | 1.27 (0.93–1.73)                         | 1.24 (0.90–1.72)                        |
| Long-term + high dose                  |                                 |                                        | 0.98 (0.70–1.36)                        | 0.82 (0.50–1.35)                         | 0.85 (0.52–1.40)                        |
| <b>Marital Status</b>                  |                                 |                                        |                                         |                                          |                                         |
| Never married                          |                                 |                                        |                                         | Ref                                      | Ref                                     |
| Married/live with a partner            |                                 |                                        |                                         | 1.12 (0.88–1.43)                         | 1.10 (0.86–1.42)                        |
| Divorced/widowed                       |                                 |                                        |                                         | 1.03 (0.80–1.33)                         | 1.01 (0.78–1.30)                        |
| <b>Homeless</b>                        |                                 |                                        |                                         |                                          |                                         |
| Yes                                    |                                 |                                        |                                         | 1.02 (0.84–1.22)                         | 0.98 (0.82–1.18)                        |
| No                                     |                                 |                                        |                                         | Ref                                      | Ref                                     |
| <b>Income</b>                          |                                 |                                        |                                         |                                          |                                         |
| <\$11,999                              |                                 |                                        |                                         | Ref                                      | Ref                                     |
| \$12,000–\$49,999                      |                                 |                                        |                                         | 1.08 (0.90–1.30)                         | 1.07 (0.89–1.29)                        |
| ≥\$50,000                              |                                 |                                        |                                         | 1.04 (0.74–1.47)                         | 1.05 (0.75–1.49)                        |
| <b>Social score</b>                    |                                 |                                        |                                         |                                          |                                         |
| <4                                     |                                 |                                        |                                         | Ref                                      | Ref                                     |
| ≥4                                     |                                 |                                        |                                         | 1.01 (0.81–1.26)                         | 1.03 (0.82–1.29)                        |
| <b>HCV</b>                             |                                 |                                        |                                         |                                          |                                         |
| Yes                                    |                                 |                                        |                                         | 0.98 (0.82–1.18)                         | 0.94 (0.78–1.12)                        |
| No                                     |                                 |                                        |                                         | Ref                                      | Ref                                     |
| <b>Anxiety</b>                         |                                 |                                        |                                         |                                          |                                         |
| Yes                                    |                                 |                                        |                                         | 1.04 (0.86–1.27)                         | 1.02 (0.84–1.24)                        |

|                       |  |                  |                         |
|-----------------------|--|------------------|-------------------------|
| No                    |  | Ref              | Ref                     |
| <b>Depression</b>     |  |                  |                         |
| Yes                   |  | 1.13 (0.92–1.40) | 1.07 (0.86–1.32)        |
| No                    |  | Ref              | Ref                     |
| <b>Smoking</b>        |  |                  |                         |
| Yes                   |  | 0.82 (0.66–1.00) | 0.83 (0.68–1.02)        |
| No                    |  | Ref              | Ref                     |
| <b>Antidepressant</b> |  |                  |                         |
| None                  |  | Ref              | Ref                     |
| Short-term            |  | 1.24 (0.97–1.58) | 1.23 (0.96–1.58)        |
| Long-term             |  | 1.13 (0.92–1.38) | <b>1.27 (1.03–1.55)</b> |
| <b>ART adherence</b>  |  |                  |                         |
| Yes                   |  |                  | <b>0.41 (0.35–0.48)</b> |
| No                    |  |                  | Ref                     |

Bold indicates statistically significant results.

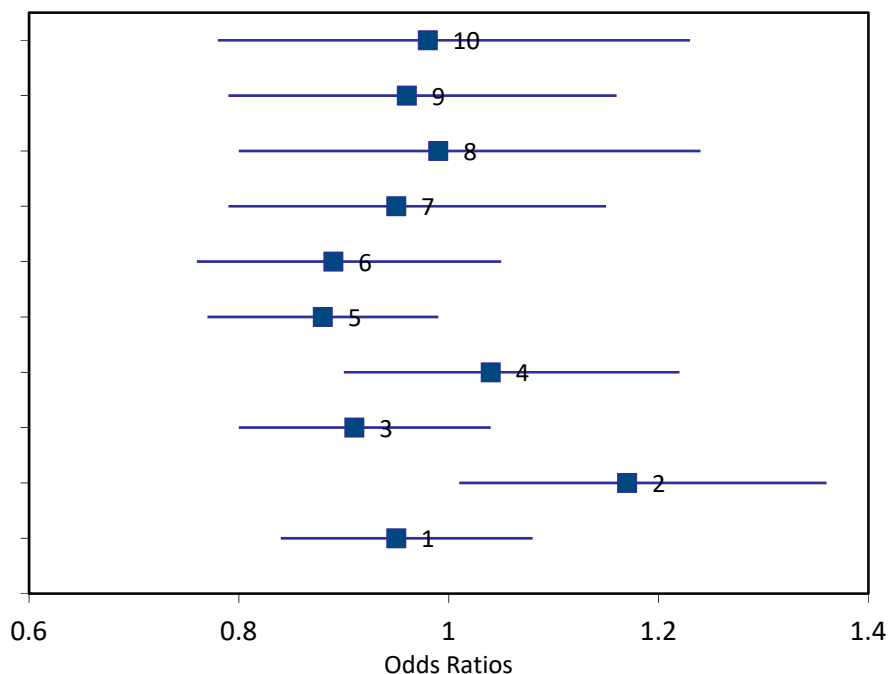

| Variable                                  | Cannabis Use                  | Odds Ratio | Lower 95%CI | Upper 95%CI | Lower Bound | Upper Bound | Order |
|-------------------------------------------|-------------------------------|------------|-------------|-------------|-------------|-------------|-------|
| Lifetime, Unadjusted Odds Ratios [95% CI] | Lifetime but no past-year use | 0.95       | 0.84        | 1.08        | 0.11        | 0.13        | 1     |
|                                           | Past-year                     | 1.17       | 1.01        | 1.36        | 0.16        | 0.19        | 2     |
| Model I, Adjusted Odds Ratios [95% CI]    | Lifetime but no past-year use | 0.91       | 0.80        | 1.04        | 0.11        | 0.13        | 3     |
|                                           | Past-year                     | 1.04       | 0.90        | 1.22        | 0.14        | 0.18        | 4     |
| Model II, Adjusted Odds Ratios [95% CI]   | Lifetime but no past-year use | 0.88       | 0.77        | 0.99        | 0.11        | 0.11        | 5     |
|                                           | Past-year                     | 0.89       | 0.76        | 1.05        | 0.13        | 0.16        | 6     |
| Model III, Adjusted Odds Ratios [95% CI]  | Lifetime but no past-year use | 0.95       | 0.79        | 1.15        | 0.16        | 0.20        | 7     |
|                                           | Past-year                     | 0.99       | 0.80        | 1.24        | 0.19        | 0.25        | 8     |
| Model IV, Adjusted Odds Ratios [95% CI]   | Lifetime but no past-year use | 0.96       | 0.79        | 1.16        | 0.17        | 0.20        | 9     |
|                                           | Past-year                     | 0.98       | 0.78        | 1.23        | 0.2         | 0.25        | 10    |

**Figure S1.** Forest Plot for Odds Ratios on the Association Between Cannabis Use & Detectable HIV Viral Load for Supplementary Table S2.
